# Supplementary material for: Machine Learning for Automated Classification of Abnormal Lung Sounds Obtained from Public Databases: A Systematic Review
Source: MDPI journal article supplement (doi:10.3390/bioengineering10101155), 2023-10-02
Supplement: s1 [file s1]

# Machine Learning for Automated Classification of Abnormal Lung Sounds Obtained from Public Databases: A Systematic Review

Juan P. Garcia-Mendez <sup>1</sup>, Amos Lal <sup>2,\*</sup>, Svetlana Herasevich <sup>1</sup>, Aysun Tekin <sup>1</sup>, Yuliya Pinevich <sup>1,3</sup>, Kirill Lipatov <sup>4</sup>, Hsin-Yi Wang <sup>1,5,6</sup>, Shahraz Qamar <sup>1</sup>, Ivan N. Ayala <sup>1</sup>, Ivan Khapov <sup>1</sup>, Danielle J. Gerberi <sup>7</sup>, Daniel Diedrich <sup>1</sup>, Brian W. Pickering <sup>1</sup> and Vitaly Herasevich <sup>1</sup>

<sup>1</sup> Department of Anesthesiology and Perioperative Medicine, Division of Critical Care, Mayo Clinic, Rochester, MN 55905, USA; ypinevich@gmail.com (Y.P.); vicky8101@gmail.com (H.-Y.W.); khapovivan2021@gmail.com (I.K.); vitaly@mayo.edu (V.H.)

<sup>2</sup> Department of Medicine, Division of Pulmonary and Critical Care Medicine, Mayo Clinic, Rochester, MN 55905, USA

<sup>3</sup> Department of Cardiac Anesthesiology and Intensive Care, Republican Clinical Medical Center, 223052 Minsk, Belarus

<sup>4</sup> Division of Pulmonary Medicine, Mayo Clinic Health Systems, Essentia Health, Duluth, MN 55805, USA

<sup>5</sup> Department of Anesthesiology, Taipei Veterans General Hospital, National Yang Ming Chiao Tung University, Taipei 11217, Taiwan

<sup>6</sup> Department of Biomedical Sciences and Engineering, National Central University, Taoyuan 320317, Taiwan

<sup>7</sup> Mayo Clinic Libraries, Mayo Clinic, Rochester, MN 55905, USA; gerberi.danielle@mayo.edu

\* Correspondence: lal.amos@mayo.edu

**Table S1.** List of included studies main characteristics. Sorted by author.

| Author, Year       | Classifier (method) | Feature Extraction (method)   | Database(s)                       | Performance Metrics                                                                                                                           | Categories          | Classification Classes                                                                                           |
|--------------------|---------------------|-------------------------------|-----------------------------------|-----------------------------------------------------------------------------------------------------------------------------------------------|---------------------|------------------------------------------------------------------------------------------------------------------|
| Acharya, 2020 [57] | CNN + RNN(Bi-LSTM)  | Mel-frequency Spectrogram     | ICBHI 2017                        | Accuracy: *<br>Sens: 48.63<br>Spec: 84.14                                                                                                     | Adventitious sounds | Normal vs Wheeze vs Crackle vs Crackle and Wheeze                                                                |
| Alqudah, 2022 [58] | CNN + RNN(LSTM)     | Convolutional Neural Networks | (1) ICBHI 2017, (2) KAUH database | Non-augmented dataset:<br>Accuracy: 99.37<br>Sens: 98.5<br>Spec: 99.87<br>Augmented dataset:<br>Accuracy: 99.53<br>Sens: 98.80<br>Spec: 99.92 | Diseases            | Healthy vs Asthma vs Fibrosis vs COPD vs BRON vs HF vs HF+COPD vs HF + Fibrosis vs Pleural effusion vs Pneumonia |
| Altan, 2020 [59]   | k-NN, DT, SVM, DBN  | Hilbert-Huang Transform       | RespiratoryDatabase@TR            | k-NN:<br>Accuracy: 83.5<br>Sens: 79.33<br>Spec: 87.67<br>DT:<br>Accuracy: 84.83<br>Sens: 87.67                                                | Diseases            | Healthy vs COPD                                                                                                  |

|                      |                      |                                                                                   |                                                                                                  |                                                                                                                                                                                              |                     |                                                                                                         |
|----------------------|----------------------|-----------------------------------------------------------------------------------|--------------------------------------------------------------------------------------------------|----------------------------------------------------------------------------------------------------------------------------------------------------------------------------------------------|---------------------|---------------------------------------------------------------------------------------------------------|
|                      |                      |                                                                                   |                                                                                                  | Spec: 82.00                                                                                                                                                                                  |                     |                                                                                                         |
|                      |                      |                                                                                   |                                                                                                  | SVM:<br>Accuracy: 89.62<br>Sens: 90.67<br>Spec: 88.59                                                                                                                                        |                     |                                                                                                         |
|                      |                      |                                                                                   |                                                                                                  | DBN:<br>Accuracy: 93.67<br>Sens: 91.00<br>Spec: 96.33                                                                                                                                        |                     |                                                                                                         |
| Bahoura, 2009 [35]   | GMM, MLP             | Fourier Transform; Linear Predictive Coding; Cepstral Analysis; Wavelet Transform | (1) Bahoura 1999<br>(2) R.A.L.E. Lung Sounds, (3) ASTRA database, and (4) Others (non-specified) | GMM:<br>Accuracy: *<br>Sens: 97.20<br>Spec: 94.20                                                                                                                                            | Adventitious sounds | Normal vs Wheeze                                                                                        |
| Bahoura, 2018 [60]   | MLP                  | Mel-Frequency Cepstral Coefficients                                               | (1) Bahoura 1999<br>(2) R.A.L.E. Lung Sounds, (3) ASTRA database, and (4) Others (non-specified) | XSG:<br>Accuracy: 86.05<br>Sens: 81.52<br>Spec: 88.51<br>MATLAB:<br>Accuracy: 86.07<br>Sens: 81.71<br>Spec: 88.43                                                                            | Adventitious sounds | Normal vs Wheeze                                                                                        |
| Bardou, 2018 [61]    | CNN (Ensemble model) | Mel-Frequency Cepstral Coefficients                                               | R.A.L.E. Lung Sounds                                                                             | Augmented + ensemble:<br>Accuracy: 95.56<br>Sens: *<br>Spec: *                                                                                                                               | Adventitious sounds | Normal vs Coarse crackle vs Fine crackle vs Monophonic wheeze vs Polyphonic wheeze vs Squawk vs Stridor |
| Basu, 2020 [62]      | NN                   | Mel-Frequency Cepstral Coefficients                                               | ICBHI 2017                                                                                       | Accuracy: 95.67<br>Sens: 95.65<br>Spec: *                                                                                                                                                    | Diseases            | Healthy vs Bronchiolitis vs Bronchiectasis vs Pneumonia vs URTI vs COPD                                 |
| Boujelben, 2018 [93] | SVM                  | Mel-Frequency Cepstral Coefficients                                               | (1) Bahoura 1999<br>(2) R.A.L.E. Lung Sounds, (3) ASTRA database, and (4) Others (non-specified) | Default XSG:<br>Accuracy: 93.72<br>Sens: 89.72<br>Spec: 96.06<br>Optimized XSG:<br>Accuracy: 93.49<br>Sens: 89.36<br>Spec: 96.06<br>MATLAB:<br>Accuracy: 93.59<br>Sens: 89.72<br>Spec: 96.06 | Adventitious sounds | Normal vs Wheeze                                                                                        |

|                                                         |                             |                                                                                                                                                                               |            |                                           |  |  |
|---------------------------------------------------------|-----------------------------|-------------------------------------------------------------------------------------------------------------------------------------------------------------------------------|------------|-------------------------------------------|--|--|
| Brunese, 2022<br>[63]                                   | k-NN, SVM,<br>NN, LR        | Mel-Fre-<br>quency<br>Cepstral Co-<br>efficients;<br>Root Mean<br>Square;<br>Chroma-<br>gram; Spec-<br>tral Cen-<br>troid; Spec-<br>tral Roll-off;<br>Zero Cross-<br>ing Rate | ICBHI 2017 | Task 1:                                   |  |  |
|                                                         |                             |                                                                                                                                                                               |            | k-NN:                                     |  |  |
|                                                         |                             |                                                                                                                                                                               |            | Accuracy: *                               |  |  |
|                                                         |                             |                                                                                                                                                                               |            | Sens: 99.7                                |  |  |
|                                                         |                             |                                                                                                                                                                               |            | Spec: 96.5                                |  |  |
|                                                         |                             |                                                                                                                                                                               |            | SVM:                                      |  |  |
|                                                         |                             |                                                                                                                                                                               |            | Accuracy: *                               |  |  |
|                                                         |                             |                                                                                                                                                                               |            | Sens: 100                                 |  |  |
|                                                         |                             |                                                                                                                                                                               |            | Spec: 96.6                                |  |  |
|                                                         |                             |                                                                                                                                                                               |            | NN:                                       |  |  |
| Accuracy: *                                             |                             |                                                                                                                                                                               |            |                                           |  |  |
| Sens: 98.8                                              |                             |                                                                                                                                                                               |            |                                           |  |  |
| Spec: 97.9                                              |                             |                                                                                                                                                                               |            |                                           |  |  |
| LR:                                                     |                             |                                                                                                                                                                               |            |                                           |  |  |
| Accuracy: *                                             |                             |                                                                                                                                                                               |            |                                           |  |  |
| Sens: 98.2                                              |                             |                                                                                                                                                                               |            |                                           |  |  |
| Spec: 97.6                                              |                             |                                                                                                                                                                               |            |                                           |  |  |
| Task 2:                                                 |                             |                                                                                                                                                                               |            |                                           |  |  |
| k-NN:                                                   |                             |                                                                                                                                                                               |            |                                           |  |  |
| Accuracy: *                                             |                             |                                                                                                                                                                               |            |                                           |  |  |
| Sens: 90.80                                             |                             |                                                                                                                                                                               |            |                                           |  |  |
| Spec: 88.30                                             |                             |                                                                                                                                                                               |            |                                           |  |  |
| SVM:                                                    |                             |                                                                                                                                                                               |            |                                           |  |  |
| Accuracy: *                                             |                             |                                                                                                                                                                               |            |                                           |  |  |
| Sens: 90.70                                             |                             |                                                                                                                                                                               |            |                                           |  |  |
| Spec: 89.00                                             |                             |                                                                                                                                                                               |            |                                           |  |  |
| NN:                                                     |                             |                                                                                                                                                                               |            |                                           |  |  |
| Accuracy: *                                             |                             |                                                                                                                                                                               |            |                                           |  |  |
| Sens: 93.10                                             |                             |                                                                                                                                                                               |            |                                           |  |  |
| Spec: 91.70                                             |                             |                                                                                                                                                                               |            |                                           |  |  |
| LR:                                                     |                             |                                                                                                                                                                               |            |                                           |  |  |
| Accuracy: *                                             |                             |                                                                                                                                                                               |            |                                           |  |  |
| Sens: 90.40                                             |                             |                                                                                                                                                                               |            |                                           |  |  |
| Spec: 88.60                                             |                             |                                                                                                                                                                               |            |                                           |  |  |
| Chen, 2019<br>[64]                                      | CNN (Resid-<br>ual Network) | Optimized<br>S-Transform                                                                                                                                                      | ICBHI 2017 | OST (Optimized<br>S control)-Res-<br>Net: |  |  |
|                                                         |                             |                                                                                                                                                                               |            | Accuracy: 98.79                           |  |  |
|                                                         |                             |                                                                                                                                                                               |            | Sens: 96.27                               |  |  |
|                                                         |                             |                                                                                                                                                                               |            | Spec: 100                                 |  |  |
|                                                         |                             |                                                                                                                                                                               |            | Adventitious<br>sounds                    |  |  |
| Normal vs Wheeze vs<br>Crackle vs Wheeze and<br>Crackle |                             |                                                                                                                                                                               |            |                                           |  |  |

|                        |                    |                                                                                                                                                                 |                                                                                                                                  |                                                                                                                                                           |                        |                                                                                                            |
|------------------------|--------------------|-----------------------------------------------------------------------------------------------------------------------------------------------------------------|----------------------------------------------------------------------------------------------------------------------------------|-----------------------------------------------------------------------------------------------------------------------------------------------------------|------------------------|------------------------------------------------------------------------------------------------------------|
|                        |                    |                                                                                                                                                                 |                                                                                                                                  | ST-ResNet:<br>Accuracy: 97.79<br>Sens: 93.17<br>Spec: 100                                                                                                 |                        |                                                                                                            |
|                        |                    |                                                                                                                                                                 |                                                                                                                                  | STFT-ResNet:<br>Accuracy: 93.98<br>Sens: 86.96<br>Spec: 97.33                                                                                             |                        |                                                                                                            |
| Chen, 2019<br>[65]     | SVM, ELM,<br>k-NN  | Enhanced<br>Generalized<br>S-Transform                                                                                                                          | (1) ICBHI 2017,<br>(2) R.A.L.E.<br>Lung Sounds                                                                                   | Accuracy: 99.52<br>Sens: 100<br>Spec: 99.27                                                                                                               | Adventitious<br>sounds | Normal vs Wheeze                                                                                           |
| Datta, 2017<br>[37]    | SVM                | Welch<br>Method<br>(Spectral<br>Features);<br>Spectrogram<br>Features;<br>Discrete<br>Wavelet<br>Transform;<br>Mel-Fre-<br>quency<br>Cepstral Co-<br>efficients | (1) R.A.L.E.<br>Lung Sounds,<br>(2) Steven Leh-<br>rer Sound Re-<br>pository (CD)<br>(3) Healthy<br>sounds were<br>self-recorded | Overlapping:<br>Accuracy: 85.00<br>Sens: *<br>Spec: *<br><br>Non-overlap-<br>ping:<br>Accuracy: 80.00<br>Sens: *<br>Spec: *                               | Adventitious<br>sounds | Normal vs Abnormal<br>(Wheeze, Crackle, Squawks,<br>Stridor, Grunt,<br>Squeak, Pleural rub)                |
| Demir, 2020<br>[67]    | CNN (LDA +<br>RSE) | Convolu-<br>tional Neu-<br>ral Net-<br>works                                                                                                                    | ICBHI 2017                                                                                                                       | Accuracy: 71.15<br>Sens: 61.00<br>Spec: 86.00                                                                                                             | Adventitious<br>sounds | Normal vs Wheeze vs<br>Crackle vs Crackle and<br>Wheeze                                                    |
| Demir, 2020<br>[66]    | CNN, SVM           | Short-time<br>Fourier<br>Transform                                                                                                                              | ICBHI 2017                                                                                                                       | Deep feature +<br>SVM:<br>Accuracy: 65.50<br>Sens: 53.00<br>Spec: 83.00<br><br>Transfer learn-<br>ing + Softmax:<br>Accuracy: 63.09<br>Sens: *<br>Spec: * | Adventitious<br>sounds | Normal vs Wheeze vs<br>Crackle vs Crackle and<br>Wheeze                                                    |
| D. Perna, 2018<br>[68] | CNN                | Mel-Fre-<br>quency<br>Cepstral Co-<br>efficients                                                                                                                | ICBHI 2017                                                                                                                       | Task 1:<br>Accuracy: 83.00<br>Sens: *<br>Spec: *<br><br>Task 2:<br>Accuracy: 82.00<br>Sens: *<br>Spec: *                                                  | Diseases               | Task 1: Healthy vs Un-<br>healthy<br><br>Task 2: Healthy vs Chronic<br>disease vs non-Chronic dis-<br>ease |

|                         |                    |                                     |                                                                |                                                                      |                     |                                                                                                         |
|-------------------------|--------------------|-------------------------------------|----------------------------------------------------------------|----------------------------------------------------------------------|---------------------|---------------------------------------------------------------------------------------------------------|
| Fraiwan, 2022 [69]      | CNN + RNN (BDLSTM) | Convolutional Neural Networks       | (1) ICBHI 2017 (only included 110 patients), (2) KAUH database | CNN only:<br>Accuracy: 99.04<br>Sens: 93.02<br>Spec: 99.33           | Diseases            | Normal vs Asthma vs Pneumonia vs Bronchiectasis vs COPD vs Heart failure                                |
|                         |                    |                                     |                                                                | BDLSTM only:<br>Accuracy: 98.16<br>Sens: 90.06<br>Spec: 98.61        |                     |                                                                                                         |
|                         |                    |                                     |                                                                | CNN + RNN (BDLSTM):<br>Accuracy: 99.62<br>Sens: 98.43<br>Spec: 99.69 |                     |                                                                                                         |
| Gairola, 2017 [70]      | CNN                | Mel-frequency Spectrogram           | ICBHI 2017                                                     | Task 1:<br>Accuracy: 77.00<br>Sens: 73.10<br>Spec: 80.90             | Adventitious sounds | Task 1: Normal vs Abnormal                                                                              |
|                         |                    |                                     |                                                                | Task 2:<br>Accuracy: 68.50<br>Sens: 53.70<br>Spec: 83.30             |                     | Task 2: Normal vs Wheeze vs Crackle vs Crackle and Wheeze                                               |
| Garcia-Ordas, 2020 [71] | CNN                | Mel-frequency Spectrogram           | ICBHI 2017                                                     | Task 1:<br>Accuracy: *<br>Sens: 98.80<br>Spec: 98.60                 | Diseases            | Task 1: Healthy vs Chronic disease vs non-Chronic disease                                               |
|                         |                    |                                     |                                                                | Task 2:<br>Accuracy: *<br>Sens: 98.50<br>Spec: 99.00                 |                     | Task 2: Healthy vs Bronchiolitis vs Bronchiectasis vs Pneumonia vs URTI vs COPD                         |
| G. Chambres, 2018 [102] | Boosted DT         | Mel-Frequency Cepstral Coefficients | ICBHI 2017                                                     | Accuracy: 49.43<br>Sens: 20.81<br>Spec: 78.05                        | Adventitious sounds | Normal vs Wheeze vs Crackle vs Crackle and Wheeze                                                       |
| Hazra, 2020 [72]        | CNN                | Mel-Frequency Cepstral Coefficients | ICBHI 2017                                                     | Accuracy: 92.39<br>Sens: 50.83<br>Spec: *                            | Diseases            | Healthy vs Bronchiolitis vs Bronchiectasis vs Pneumonia vs URTI vs COPD                                 |
| Jaber, 2020 [109]       | RF                 | Mel-Frequency Cepstral Coefficients | R.A.L.E. Lung Sounds                                           | Accuracy: 99.04<br>Sens: 98.70<br>Spec: 99.49                        | Adventitious sounds | Normal vs Coarse crackle vs Fine crackle vs Monophonic wheeze vs Polyphonic wheeze vs Squawk vs Stridor |
| Jakovljevic, 2018 [113] | HMM                | Mel-Frequency Cepstral Coefficients | ICBHI 2017                                                     | Accuracy: *<br>Sens: 42.32<br>Spec: 59.69                            | Adventitious sounds | Normal vs Wheeze vs Crackle vs Crackle and Wheeze                                                       |

|                     |                                              |                                                                                       |                                              |                                                                                                                  |                                       |                                                                                         |
|---------------------|----------------------------------------------|---------------------------------------------------------------------------------------|----------------------------------------------|------------------------------------------------------------------------------------------------------------------|---------------------------------------|-----------------------------------------------------------------------------------------|
| Jung, 2021 [73]     | DS-CNN                                       | Mel-Frequency Cepstral Coefficients; Short-time Fourier Transform                     | Hsiao 2020                                   | Accuracy: 85.74<br>Sens: 86.25<br>Spec: 86.75                                                                    | Adventitious sounds                   | Normal vs Wheeze vs Crackle vs Unknown                                                  |
| Kochetov, 2018 [74] | NM-RNN                                       | Mel-Frequency Cepstral Coefficients                                                   | ICBHI 2017                                   | Accuracy: *<br>Sens: 58.40<br>Spec: 73.00                                                                        | Adventitious sounds                   | Normal vs Wheeze vs Crackle vs Crackle and Wheeze                                       |
| Kok, 2019 [103]     | DT                                           | Mel-Frequency Cepstral Coefficients; Discrete Wavelet Transform; Time Domain Features | ICBHI 2017                                   | Accuracy: 87.1<br>Sens: 86.80<br>Spec: 93.60                                                                     | Adventitious sounds                   | Task 1: Normal vs abnormal<br>Task 2: Normal vs Wheeze vs Crackle vs Crackle and Wheeze |
| Li, 2022 [75]       | Explainable CNN (based on fuzzy DT)          | Mel-frequency Spectrogram                                                             | ICBHI 2017                                   | Task 1:<br>Accuracy: *<br>Sens: 61.00<br>Spec: 82.00<br><br>Task 2:<br>Accuracy: *<br>Sens: 98.00<br>Spec: 92.00 | Both adventitious sounds and diseases | Task 1: Crackle vs Normal vs Wheeze<br>Task 2: COPD vs Healthy vs Pneumonia             |
| Li, 2021 [76]       | CNN (ResNet+Attention-augmented convolution) | Dual tunable Q-factor Wavelet Transform; Short-time Fourier Transform                 | ICBHI 2017                                   | Accuracy: *<br>Sens: 36.36<br>Spec: 71.44                                                                        | Adventitious sounds                   | Normal vs Wheeze vs Crackle vs Crackle and Wheeze                                       |
| Lu, 2008 [34]       | GMM                                          | Wavelet Packet Transform                                                              | (1) ASTRA database, (2) R.A.L.E. Lung Sounds | Accuracy: *<br>Sens: 92.90<br>Spec: 94.40                                                                        | Adventitious sounds                   | Normal vs Crackle vs Wheeze                                                             |
| Minami, 2019 [77]   | CNN                                          | Short-Time Fourier Transform; Wavelet Transform                                       | ICBHI 2017                                   | Accuracy: *<br>Sens: 28.00<br>Spec: 81.00                                                                        | Diseases                              | Bronchiectasis vs pneumonia vs bronchiolitis vs COPD vs URTI vs normal                  |
| Monaco, 2020 [78]   | MLP, SVM, DNN, RF                            | Multi-time Scale Feature Extraction                                                   | ICBHI 2017                                   | MLP:<br>Accuracy: 85.00<br>Sens: *<br>Spec: *                                                                    | Adventitious sounds                   | Normal vs Crackle vs Wheeze vs Crackle and Wheeze                                       |

|                      |                     |                                                                                                                      |                                          |                                                   |                     |                                                                                         |
|----------------------|---------------------|----------------------------------------------------------------------------------------------------------------------|------------------------------------------|---------------------------------------------------|---------------------|-----------------------------------------------------------------------------------------|
|                      |                     |                                                                                                                      |                                          | RF:<br>Accuracy: 84.00<br>Sens: *<br>Spec: *      |                     |                                                                                         |
|                      |                     |                                                                                                                      |                                          | DNN:<br>Accuracy: 82.00<br>Sens: *<br>Spec: *     |                     |                                                                                         |
|                      |                     |                                                                                                                      |                                          | SVM:<br>Accuracy: 81.00<br>Sens: *<br>Spec: *     |                     |                                                                                         |
| Mukherjee, 2021 [79] | MLP                 | Linear Predictive Cepstral Coefficient                                                                               | ICBHI 2017                               | Accuracy: 99.22<br>Sens: 99.17<br>Spec: 99.26     | Diseases            | Healthy vs non-Healthy                                                                  |
| Naqvi, 2020 [106]    | QDA                 | Mel-Frequency Cepstral Coefficients; Gammatone Cepstral Coefficients; Time Domain Features; Spectral Domain Features | ICBHI 2017                               | Accuracy: 99.80<br>Sens: *<br>Spec: *             | Diseases            | Healthy, COPD, Pneumonia                                                                |
| Naves, 2016 [39]     | k-NN, Naive Bayes   | Higher-order Statistics                                                                                              | Steven Lehrer Sound Repository 2002 (CD) | Accuracy: 94.60<br>Sens: *<br>Spec: *             | Adventitious sounds | Normal vs coarse crackle vs Fine crackle vs Monophonic wheeze vs Polyphonic wheeze      |
| Ngo, 2021 [80]       | C-DNN + autoencoder | Short-time Fourier Transform, Gammatone                                                                              | ICBHI 2017                               | Accuracy: *<br>Sens: 30.00<br>Spec: 69.00         | Adventitious sounds | Normal vs Crackle vs Wheeze vs Crackle and Wheeze                                       |
|                      |                     |                                                                                                                      |                                          | Task 1:                                           |                     |                                                                                         |
|                      |                     |                                                                                                                      |                                          | CNN:<br>Accuracy: *<br>Sens: 69.10<br>Spec: 86.10 |                     |                                                                                         |
| Nguyen, 2020 [81]    | CNN, SE             | Fast Fourier Transform                                                                                               | ICBHI 2017                               | SE:<br>Accuracy: *<br>Sens: 69.40<br>Spec: 87.30  | Adventitious sounds | Task 1: Normal vs Crackle vs Wheeze vs Crackle and Wheeze<br>Task 2: Normal vs Abnormal |
|                      |                     |                                                                                                                      |                                          | Task 2:                                           |                     |                                                                                         |

|                         |            |                                                                 |                                                                                                                                                                                             |                                                   |                     |                                                                          |
|-------------------------|------------|-----------------------------------------------------------------|---------------------------------------------------------------------------------------------------------------------------------------------------------------------------------------------|---------------------------------------------------|---------------------|--------------------------------------------------------------------------|
|                         |            |                                                                 |                                                                                                                                                                                             | CNN:<br>Accuracy: *<br>Sens: 80.40<br>Spec: 86.10 |                     |                                                                          |
|                         |            |                                                                 |                                                                                                                                                                                             | SE:<br>Accuracy: *<br>Sens: 80.10<br>Spec: 87.30  |                     |                                                                          |
| Ntalampiras, 2020 [114] | DAG-HMM    | Discrete Wavelet Transform                                      | ICBHI 2017                                                                                                                                                                                  | Accuracy: 50.10<br>Sens: *<br>Spec: *             | Adventitious sounds | Normal vs Crackle vs Wheeze vs Crackle and Wheeze                        |
| Ntalampiras, 2020 [111] | HMM + GMM  | Mel-Frequency Cepstral Coefficients; Discrete Wavelet Transform | ICBHI 2017                                                                                                                                                                                  | Accuracy: 66.70<br>Sens: *<br>Spec: *             | Adventitious sounds | Normal vs Abnormal                                                       |
| Oletic, 2014 [104]      | DT         | Short-time Fourier Transform                                    | (1) R.A.L.E. Lung Sounds, (2) Stetho-graphics Lung Sound Samples, (3) Mediscuss Respiratory Sounds, (4) 3M Littmann Lung Soundsw Library, (5) East Tennessee State University Breath Sounds | Accuracy: 92.96<br>Sens: 96.92<br>Spec: 91.21     | Adventitious sounds | Normal vs Wheeze                                                         |
| Oletic, 2018 [115]      | HMM        | CS-recovered Short-time Fourier Transform                       | (1) R.A.L.E. Lung Sounds, (2) Stetho-graphics Lung Sound Samples, (3) Mediscuss Respiratory Sounds, (4) 3M Littmann Lung Soundsw Library, (5) East Tennessee State University Breath Sounds | Accuracy: 94.91<br>Sens: 89.34<br>Spec: 96.28     | Adventitious sounds | Normal vs Wheeze                                                         |
| Oweis, 2015 [38]        | ANN, ANFIS | Fast Fourier Transform                                          | (1) Williams 2009 (CD), (2) Steven Lehrer                                                                                                                                                   | ANN:<br>Accuracy: 98.60<br>Sens: 97.80            | Adventitious sounds | Bronchovesicular vs Normal bronchial vs Abnormal bronchial vs Crackle vs |



|                        |                  |                                                                                                                                            |                            |                                                                                                                                                                                         |                                       |                                                                                                                                                                                                                                                                    |
|------------------------|------------------|--------------------------------------------------------------------------------------------------------------------------------------------|----------------------------|-----------------------------------------------------------------------------------------------------------------------------------------------------------------------------------------|---------------------------------------|--------------------------------------------------------------------------------------------------------------------------------------------------------------------------------------------------------------------------------------------------------------------|
|                        |                  |                                                                                                                                            | Sound Repository 2002 (CD) | Spec: 100<br>ANFIS:<br>Accuracy: 66.40<br>Sens: 56.90<br>Spec: 70.40                                                                                                                    |                                       | Wheeze vs Stridor vs Normal bronchophony vs Bronchophony by consolidation vs Normal egophony vs Abnormal egophony                                                                                                                                                  |
| Palaniappan, 2014 [14] | SVM, k-NN        | Mel-Frequency Cepstral Coefficients                                                                                                        | R.A.L.E. Lung Sounds       | SVM:<br>Accuracy: 92.19<br>Sens: *,<br>Spec: *<br>k-NN:<br>Accuracy: 98.26<br>Sens: *<br>Spec: *                                                                                        | Diseases                              | Norma vs Airway obstruction vs Parenchymal pathology                                                                                                                                                                                                               |
| Paraschiv, 2020 [82]   | 2D CNN           | Mel-Frequency Cepstral Coefficients; Discrete Fourier Transform                                                                            | ICBHI 2017                 | Accuracy: 90.21<br>Sens: *<br>Spec: *                                                                                                                                                   | Diseases                              | Bronchiectasis vs Pneumonia vs Bronchiolitis vs COPD vs URTI vs Normal                                                                                                                                                                                             |
| Petmezas, 2022 [83]    | CNN + RNN (LSTM) | Short-time Fourier Transform                                                                                                               | ICBHI 2017                 | Accuracy: 76.39<br>Sens: 52.78<br>Spec: 84.26                                                                                                                                           | Adventitious sounds                   | Normal vs Crackle vs Wheeze vs Crackle and Wheeze                                                                                                                                                                                                                  |
| Pham, 2021 [85]        | CNN              | Continuous Wavelet Transform                                                                                                               | ICBHI 2017                 | Task 1:<br>Accuracy: *<br>Sens: 32.00<br>Spec: 73.00<br>Task 2:<br>Accuracy: *<br>Sens: 85.00<br>Spec: 88.00                                                                            | Both adventitious sounds and diseases | Task 1: Normal vs Crackle vs Wheeze vs Crackle and Wheeze<br>Task 2: Healthy vs Chronic disease (COPD, bronchiectasis, asthma) vs non-Chronic disease (URTI, LRTI, Pneumonia, Bronchiolitis)                                                                       |
| Pham, 2021 [84]        | C-DNN            | Mel-frequency Spectrogram; Gammatone Filterbank Spectrogram; Stacked Mel-Frequency Cepstral Coefficients; Rectangular Constant Q Transform | ICBHI 2017                 | Task 1.1:<br>Accuracy: *<br>Sens: 68.00<br>Spec: 90.00<br>Task 1.2:<br>Accuracy: *<br>Sens: 78.00<br>Spec: 90.00<br>Task 2.1:<br>Accuracy: *<br>Sens: 95.00<br>Spec: 86.00<br>Task 2.2: | Both adventitious sounds and diseases | Task 1.1: Normal vs Crackle vs Wheeze vs Crackle and Wheeze<br>Task 1.2: Normal vs Abnormal<br>Task 2.1: Healthy vs Chronic disease (COPD, bronchiectasis, asthma) vs non-Chronic disease (URTI, LRTI, Pneumonia, Bronchiolitis)<br>Task 2.2: Healthy vs Unhealthy |

|                          |                                      |                                                                                           |                                                                                                                                             |                 |                     |                              |
|--------------------------|--------------------------------------|-------------------------------------------------------------------------------------------|---------------------------------------------------------------------------------------------------------------------------------------------|-----------------|---------------------|------------------------------|
|                          |                                      |                                                                                           |                                                                                                                                             | Accuracy: *     |                     |                              |
|                          |                                      |                                                                                           |                                                                                                                                             | Sens: 98.00     |                     |                              |
|                          |                                      |                                                                                           |                                                                                                                                             | Spec: 86.00     |                     |                              |
| Pham Thi Viet, 2022 [86] | CNN + Ensemble learning              | Continuous Wavelet Transform                                                              | ICBHI 2017                                                                                                                                  | Task 1:         | Adventitious sounds | Task 1: Normal vs Abnormal   |
|                          |                                      |                                                                                           |                                                                                                                                             | Accuracy: *     |                     |                              |
|                          |                                      |                                                                                           |                                                                                                                                             | Sens: 83.10     |                     |                              |
|                          |                                      |                                                                                           |                                                                                                                                             | Spec: 86.40     |                     |                              |
|                          |                                      |                                                                                           |                                                                                                                                             | Task 2:         |                     |                              |
|                          |                                      |                                                                                           |                                                                                                                                             | Accuracy: *     |                     |                              |
|                          |                                      |                                                                                           |                                                                                                                                             | Sens: 75.10     |                     |                              |
|                          |                                      |                                                                                           |                                                                                                                                             | Spec: 84.20     |                     |                              |
| Porieva, 2021 [107]      | QDA                                  | Fast Fourier Transform; Multilevel Wavelet Transform; Mel-Frequency Cepstral Coefficients | CORA database                                                                                                                               | Accuracy: 93.2  | Diseases            | Normal vs Bronchitis vs COPD |
|                          |                                      |                                                                                           |                                                                                                                                             | Sens: *         |                     |                              |
|                          |                                      |                                                                                           |                                                                                                                                             | Spec: *         |                     |                              |
| Pramono, 2019 [119]      | LR                                   | Mel-Frequency Cepstral Coefficients; Tonality Index; Linear Predictive Coding             | (1) R.A.L.E. Lung Sounds, (2) Pulmonary Breath Sounds ETSU 2002, (3) 3M Littmann Lung Sounds Library, (4) Stethographics Lung Sound Samples | Accuracy: *     | Adventitious sounds | Normal vs Wheeze             |
|                          |                                      |                                                                                           |                                                                                                                                             | Sens: 83.86     |                     |                              |
|                          |                                      |                                                                                           |                                                                                                                                             | Spec: 81.19     |                     |                              |
|                          |                                      |                                                                                           |                                                                                                                                             |                 |                     |                              |
|                          |                                      |                                                                                           |                                                                                                                                             | LDA:            |                     |                              |
|                          |                                      |                                                                                           |                                                                                                                                             | Accuracy: 84.20 |                     |                              |
|                          |                                      |                                                                                           |                                                                                                                                             | Sens: *         |                     |                              |
|                          |                                      |                                                                                           |                                                                                                                                             | Spec: *         |                     |                              |
| Rocha, 2020 [87]         | LDA, SVM, RUSBoost (Type of DT), CNN | Short-term Fourier Transform                                                              | ICBHI 2017                                                                                                                                  | SVM:            | Adventitious sounds | Crackle vs Wheeze vs Others  |
|                          |                                      |                                                                                           |                                                                                                                                             | Accuracy: 89.70 |                     |                              |
|                          |                                      |                                                                                           |                                                                                                                                             | Sens: *         |                     |                              |
|                          |                                      |                                                                                           |                                                                                                                                             | Spec: *         |                     |                              |
|                          |                                      |                                                                                           |                                                                                                                                             | RUSBoost:       |                     |                              |
|                          |                                      |                                                                                           |                                                                                                                                             | Accuracy: 92.30 |                     |                              |
|                          |                                      |                                                                                           |                                                                                                                                             | Sens: *         |                     |                              |
|                          |                                      |                                                                                           |                                                                                                                                             | Spec: *         |                     |                              |
|                          |                                      |                                                                                           |                                                                                                                                             | CNN:            |                     |                              |
|                          |                                      |                                                                                           |                                                                                                                                             | Accuracy: 96.90 |                     |                              |
|                          |                                      |                                                                                           |                                                                                                                                             | Sens: *         |                     |                              |
|                          |                                      |                                                                                           |                                                                                                                                             | Spec: *         |                     |                              |

|                          |                 |                                                                                             |                                               |                                                                                                                      |                     |                                                                                                                                                                                                                        |
|--------------------------|-----------------|---------------------------------------------------------------------------------------------|-----------------------------------------------|----------------------------------------------------------------------------------------------------------------------|---------------------|------------------------------------------------------------------------------------------------------------------------------------------------------------------------------------------------------------------------|
| Sen, 2014 [94]           | LIBSVM          | Vector Auto-regression                                                                      | Bogazici University Lung Acoustics Laboratory | Task 1:<br>Accuracy: *<br>Sens: 85.00<br>Spec: 85.00<br><br>Task 2:<br>Accuracy: *<br>Sens: 75.00<br>Spec: *         | Diseases            | Task 1: Healthy vs Pathologic<br><br>Task 2: Healthy vs Bronchiectasis vs Interstitial pulmonary disease                                                                                                               |
| Serbes, 2018 [95]        | SVM             | Short-time Fourier Transform; Non-linear Resonance Based Wavelet Decomposition              | ICBHI 2017                                    | Accuracy: 57.88<br>Sens: 55.29<br>Spec: 83.25                                                                        | Adventitious sounds | Normal vs crackle vs wheeze vs crackle and wheeze                                                                                                                                                                      |
| Shuvo, 2020 [88]         | Lightweight CNN | Empirical Mode Decomposition; Continuous Wavelet Transform                                  | ICBHI 2017                                    | Task 1:<br>Accuracy: 98.92<br>Sens: 98.90<br>Spec: 100<br><br>Task 2:<br>Accuracy: 98.70<br>Sens: 98.60<br>Spec: 100 | Diseases            | Task 1: Healthy vs Chronic disease (COPD, Bronchiectasis, Asthma) vs non-Chronic disease (URTI, LRTI, Pneumonia, Bronchiolitis)<br><br>Task 2: Healthy vs Bronchiectasis vs Bronchiolitis vs COPD vs Pneumonia vs URTI |
| Sosa, 2015 [97]          | SVM             | Short-time Fourier Transform; Wavelet Packet Transform; Mel-Frequency Cepstral Coefficients | R.A.L.E. Lung Sounds                          | Accuracy: *<br>Sens: 81.50<br>Spec: 82.60                                                                            | Adventitious sounds | Normal vs Wheeze                                                                                                                                                                                                       |
| Stasiakiewicz, 2021 [96] | SVM             | Continuous Wavelet Transform                                                                | (1) ICBHI 2017, (2) Self-recorded             | Accuracy: 98.00<br>Sens: 97.80<br>Spec: 98.20                                                                        | Diseases            | Healthy vs Pneumonia vs Pulmonary fibrosis vs Heart failure vs COPD                                                                                                                                                    |
| Tariq, 2019 [89]         | 2D CNN          | Mel-frequency Spectrogram                                                                   | ICBHI 2017                                    | Accuracy: 97.00<br>Sens: *<br>Spec: *                                                                                | Diseases            | Healthy vs Asthma vs COPD vs Bronchiectasis vs Pneumonia vs LRTI vs URTI                                                                                                                                               |
| Tasar, 2022 [98]         | k-NN, SVM, DT   | Tunable Q Factor Wavelet; Iterative Neighborhood                                            | ICBHI 2017                                    | Task 1:<br><br>k-NN:<br>Accuracy: 99.45<br>Sens: 99.52<br>Spec: 98.78                                                | Diseases            | Task 1: Healthy vs Bronchiolitis vs COPD vs Bronchiectasis vs Pneumonia vs LRTI vs URTI<br><br>Task 2: COPD vs Pneumonia vs Asthma                                                                                     |

|                      |      |                             |                                     |                                                                                                                                                                                                                                                                                                                                                                                                                                                                                                                               |                                                                                                   |                                        |
|----------------------|------|-----------------------------|-------------------------------------|-------------------------------------------------------------------------------------------------------------------------------------------------------------------------------------------------------------------------------------------------------------------------------------------------------------------------------------------------------------------------------------------------------------------------------------------------------------------------------------------------------------------------------|---------------------------------------------------------------------------------------------------|----------------------------------------|
|                      |      | Component Analysis          |                                     | SVM:<br>Accuracy: 98.41<br>Sens: 96.97<br>Spec: 99.01<br><br>DT:<br>Accuracy: 83.70<br>Sens: 77.76<br>Spec: 78.91<br><br>Task 2:<br><br>k-NN:<br>Accuracy: 99.31<br>Sens: 99.57<br>Spec: 99.46<br><br>SVM:<br>Accuracy: 97.87<br>Sens: 98.55<br>Spec: 98.48<br><br>DT:<br>Accuracy: 96.66<br>Sens: 94.35<br>Spec: 97.19<br><br>Task 3:<br><br>k-NN:<br>Accuracy: 99.19<br>Sens: 99.01<br>Spec: 98.77<br><br>SVM:<br>Accuracy: 97.80<br>Sens: 96.63<br>Spec: 98.19<br><br>DT:<br>Accuracy: 86.41<br>Sens: 82.06<br>Spec: 82.40 | Task 3: Healthy vs Asthma vs COPD vs Bronchiectasis vs Bronchiolitis vs Pneumonia vs LRTI vs URTI |                                        |
| Tocchetto, 2014 [36] | ANN  | Wavelet Packet Transform    | Steven Lehrer Sound Repository (CD) | Accuracy: 99.26<br>Sens: *<br>Spec: *                                                                                                                                                                                                                                                                                                                                                                                                                                                                                         | Adventitious sounds                                                                               | Normal vs Wheeze vs Crackle            |
| Tripathy, 2022 [117] | LGBM | Empirical Wavelet Transform | KAUH database                       | Accuracy: 84.76<br>Sens: 91.12<br>Spec: 82.96                                                                                                                                                                                                                                                                                                                                                                                                                                                                                 | Diseases                                                                                          | Healthy vs asthma vs COPD vs Pneumonia |

|                                                               |                               |                                                        |                                                                                             |                                                                                                                        |                     |                                                                                               |
|---------------------------------------------------------------|-------------------------------|--------------------------------------------------------|---------------------------------------------------------------------------------------------|------------------------------------------------------------------------------------------------------------------------|---------------------|-----------------------------------------------------------------------------------------------|
| <p>GB:<br/>Accuracy: 97.00<br/>Sens: *<br/>Spec: *</p>        |                               |                                                        |                                                                                             |                                                                                                                        |                     |                                                                                               |
| Vidhya, 2022 [99]                                             | GB, SVM, k-NN                 | Mel-Frequency Cepstral Coefficients                    | ICBHI 2017                                                                                  | SVM:<br>Accuracy: 69.40<br>Sens: *<br>Spec: *                                                                          | Diseases            | Healthy vs Pneumonia                                                                          |
| <p>k-NN:<br/>Accuracy: 90.23<br/>Sens: *<br/>Spec: *</p>      |                               |                                                        |                                                                                             |                                                                                                                        |                     |                                                                                               |
| Yang, 2020 [90]                                               | CNN (ResNet)                  | Short-time Fourier Transform                           | ICBHI 2017                                                                                  | Accuracy: *<br>Sens: 17.80<br>Spec: 81.20                                                                              | Adventitious sounds | Normal vs Crackle vs Wheeze vs Crackle and Wheeze                                             |
| Yi Ma, 2019 [91]                                              | Bi-ResNet NN                  | Short-time Fourier Transform; Wavelet Packet Transform | ICBHI 2017                                                                                  | Accuracy: 67.44<br>Sens: 58.54<br>Spec: 80.06                                                                          | Adventitious sounds | Normal vs Crackle vs Wheeze vs Crackle and Wheeze                                             |
| <p>AlexNet:<br/>Accuracy: 100<br/>Sens: 100<br/>Spec: *</p>   |                               |                                                        |                                                                                             |                                                                                                                        |                     |                                                                                               |
| Zulfiqar, 2021 [18]                                           | AlexNet, InceptionNet, ResNet | Fourier Transform                                      | (1) R.A.L.E. Lung Sounds, (2) Thinklabs database, (3) Easy Auscultation database (4) Others | InceptionNet:<br>Accuracy: 95.00<br>Sens: 95.00<br>Spec: *<br><br>ResNet:<br>Accuracy: 95.00<br>Sens: 93.00<br>Spec: * | Adventitious sounds | Coarse crackle vs. Fine crackle vs. Pleural rub vs. Rhonchi vs. Squawk vs. Stridor vs. Wheeze |
| <p>LeNet:<br/>Accuracy: 89.00<br/>Sens: 90.00<br/>Spec: *</p> |                               |                                                        |                                                                                             |                                                                                                                        |                     |                                                                                               |

Legend: ANFIS: Adaptive Neuro-Fuzzy Interference Systems; BDLSTM: Bi-Directional Long Short-Term Memory Neural Network; DAG: Directed Acyclic Graph (type of CNN); DBN: Deep Belief Networks; DNN: Deep neural network; DS-CNN: Depthwise Separable Convolutional Neural Network; DT: Decision Tree; ELM: Extreme Learning Machine; GMM: Gaussian Mixture Models; HMM: Hidden Markov Model; k-NN: k-Nearest Neighbor; LDA: Linear Discriminant Analysis; LGBM: Light Gradient Boosting Machine; LR: Logistic Regression; MLP: Multi-Layer Perceptron; NM-RNN: Noise-Masking Recurrent Neural Network; QD: Quadratic Discriminant Analysis (type of Discriminant Analysis); RF: Random Forest; RSE: Random Subspace Ensembles; RUSBoost: Random Undersampling Boosted Trees; SE: Snapshot Ensemble (type of CNN); SVM: Support Vector Machine; XSG: Xilinx System Generator

\*Not provided in the manuscript.

**Table S2.** Individual risk of bias assessment. Sorted in the same order as Table S1.

| Author, Year            | Patient Selection | Index Test | Reference Standard | Flow and timing |
|-------------------------|-------------------|------------|--------------------|-----------------|
| Acharya, 2020 [57]      | High              | Low        | High               | Low             |
| Alqudah, 2022 [58]      | High              | Low        | High               | Low             |
| Altan, 2020 [59]        | High              | Low        | High               | Low             |
| Bahoura, 2009 [35]      | High              | Low        | High               | Unclear         |
| Bahoura, 2018 [60]      | High              | Low        | High               | Unclear         |
| Bardou, 2018 [61]       | Unclear           | Low        | High               | Unclear         |
| Basu, 2020 [62]         | High              | Low        | High               | Low             |
| Boujelben, 2018 [93]    | High              | Low        | High               | Unclear         |
| Brunese, 2022 [63]      | High              | Low        | High               | Low             |
| Chen, 2019 [64]         | High              | Low        | High               | Low             |
| Chen, 2019 [65]         | High              | Low        | High               | Unclear         |
| Datta, 2017 [37]        | High              | Low        | High               | High            |
| Demir, 2020 [67]        | High              | Low        | High               | Low             |
| Demir, 2020 [66]        | High              | Low        | High               | Low             |
| D. Perna, 2018 [68]     | High              | Low        | High               | Low             |
| Fraiwani, 2022 [69]     | High              | Low        | High               | Low             |
| Gairola, 2017 [70]      | High              | Low        | High               | Low             |
| Garcia-Ordas, 2020 [71] | High              | Low        | High               | Low             |
| G. Chambres, 2018 [102] | High              | Low        | High               | Low             |
| Hazra, 2020 [72]        | High              | Low        | High               | Low             |
| Jaber, 2020 [109]       | Unclear           | Low        | High               | High            |
| Jakovljevic, 2018 [113] | High              | Low        | High               | Low             |
| Jung, 2021 [73]         | Unclear           | Low        | High               | Low             |
| Kochetov, 2018 [74]     | High              | Low        | High               | Low             |
| Kok, 2019 [103]         | High              | Low        | High               | Low             |
| Li, 2022 [75]           | High              | Low        | High               | Low             |
| Li, 2021 [76]           | High              | Low        | High               | Low             |
| Lu, 2008 [34]           | High              | Low        | High               | High            |
| Minami, 2019 [77]       | High              | Low        | High               | Low             |
| Monaco, 2020 [78]       | High              | Low        | High               | Low             |
| Mukherjee, 2021 [79]    | High              | Low        | High               | Low             |
| Naqvi, 2020 [106]       | High              | Low        | High               | Low             |
| Naves, 2016 [39]        | Unclear           | Low        | Unclear            | Unclear         |

|                          |         |     |         |         |
|--------------------------|---------|-----|---------|---------|
| Ngo, 2021 [80]           | High    | Low | High    | Low     |
| Nguyen, 2020 [81]        | High    | Low | High    | Low     |
| Ntalampiras, 2020 [114]  | High    | Low | High    | Low     |
| Ntalampiras, 2020 [111]  | High    | Low | High    | Low     |
| Oletic, 2014 [104]       | High    | Low | High    | High    |
| Oletic, 2018 [115]       | High    | Low | High    | High    |
| Oweis, 2015 [38]         | High    | Low | Unclear | Unclear |
| Palaniappan, 2014 [14]   | Unclear | Low | High    | Unclear |
| Paraschiv, 2020 [82]     | High    | Low | High    | Low     |
| Petmezas, 2022 [83]      | High    | Low | High    | Low     |
| Pham, 2021 [85]          | High    | Low | High    | Low     |
| Pham, 2021 [84]          | High    | Low | High    | Low     |
| Pham Thi Viet, 2022 [86] | High    | Low | High    | Low     |
| Porieva, 2021 [107]      | Unclear | Low | Unclear | Unclear |
| Pramono, 2019 [119]      | High    | Low | High    | Unclear |
| Rocha, 2020 [87]         | High    | Low | High    | Low     |
| Sen, 2014 [94]           | Unclear | Low | High    | High    |
| Serbes, 2018 [95]        | High    | Low | High    | Low     |
| Shuvo, 2020 [88]         | High    | Low | High    | High    |
| Sosa, 2015 [97]          | Unclear | Low | High    | Unclear |
| Stasiakiewicz, 2021 [96] | High    | Low | High    | High    |
| Tariq, 2019 [89]         | High    | Low | High    | Low     |
| Tasar, 2022 [98]         | High    | Low | High    | Low     |
| Tocchetto, 2014 [36]     | Unclear | Low | Unclear | Unclear |
| Tripathy, 2022 [117]     | Low     | Low | High    | Low     |
| Vidhya, 2022 [99]        | High    | Low | High    | Low     |
| Yang, 2020 [90]          | High    | Low | High    | Low     |
| Yi Ma, 2019 [91]         | High    | Low | High    | Low     |
| Zulfiqar, 2021 [18]      | High    | Low | High    | High    |

**Table S3.** Individual applicability concerns assessment. Sorted in the same order as Table S1.

| Author, Year       | Patient Selection | Index Test | Reference Standard |
|--------------------|-------------------|------------|--------------------|
| Acharya, 2020 [57] | High              | Low        | High               |
| Alqudah, 2022 [58] | High              | Low        | High               |
| Altan, 2020 [59]   | Low               | Low        | High               |
| Bahoura, 2009 [35] | Uncertain         | Low        | High               |
| Bahoura, 2018 [60] | Uncertain         | Low        | High               |
| Bardou, 2018 [61]  | Uncertain         | Low        | High               |

|                          |           |     |      |
|--------------------------|-----------|-----|------|
| Basu, 2020 [62]          | High      | Low | High |
| Boujelben, 2018 [93]     | Uncertain | Low | High |
| Brunese, 2022 [63]       | High      | Low | High |
| Chen, 2019 [64]          | High      | Low | High |
| Chen, 2019 [65]          | High      | Low | High |
| Datta, 2017 [37]         | Uncertain | Low | High |
| Demir, 2020 [67]         | High      | Low | High |
| Demir, 2020 [66]         | High      | Low | High |
| D. Perna, 2018 [68]      | High      | Low | High |
| Fraiwan, 2022 [69]       | High      | Low | High |
| Gairola, 2017 [70]       | High      | Low | High |
| Garcia-Ordas, 2020 [71]  | High      | Low | High |
| G. Chambres, 2018 [102]  | High      | Low | High |
| Hazra, 2020 [72]         | High      | Low | High |
| Jaber, 2020 [109]        | Uncertain | Low | High |
| Jakovljevic, 2018 [113]  | High      | Low | High |
| Jung, 2021 [73]          | Low       | Low | High |
| Kochetov, 2018 [74]      | High      | Low | High |
| Kok, 2019 [103]          | High      | Low | High |
| Li, 2022 [75]            | High      | Low | High |
| Li, 2021 [76]            | High      | Low | High |
| Lu, 2008 [34]            | Uncertain | Low | High |
| Minami, 2019 [77]        | High      | Low | High |
| Monaco, 2020 [78]        | High      | Low | High |
| Mukherjee, 2021 [79]     | High      | Low | High |
| Naqvi, 2020 [106]        | High      | Low | High |
| Naves, 2016 [39]         | Uncertain | Low | High |
| Ngo, 2021 [80]           | High      | Low | High |
| Nguyen, 2020 [81]        | High      | Low | High |
| Ntalampiras, 2020 [114]  | High      | Low | High |
| Ntalampiras, 2020 [111]  | High      | Low | High |
| Oletic, 2014 [104]       | Uncertain | Low | High |
| Oletic, 2018 [115]       | Uncertain | Low | High |
| Oweis, 2015 [38]         | Uncertain | Low | High |
| Palaniappan, 2014 [14]   | Uncertain | Low | High |
| Paraschiv, 2020 [82]     | High      | Low | High |
| Petmezas, 2022 [83]      | High      | Low | High |
| Pham, 2021 [85]          | High      | Low | High |
| Pham, 2021 [84]          | High      | Low | High |
| Pham Thi Viet, 2022 [86] | High      | Low | High |
| Porieva, 2021 [107]      | Uncertain | Low | High |
| Pramono, 2019 [119]      | Uncertain | Low | High |



|                          |           |     |      |
|--------------------------|-----------|-----|------|
| Rocha, 2020 [87]         | High      | Low | High |
| Sen, 2014 [94]           | Uncertain | Low | High |
| Serbes, 2018 [95]        | High      | Low | High |
| Shuvo, 2020 [88]         | High      | Low | High |
| Sosa, 2015 [97]          | Uncertain | Low | High |
| Stasiakiewicz, 2021 [96] | High      | Low | High |
| Tariq, 2019 [89]         | High      | Low | High |
| Tasar, 2022 [98]         | High      | Low | High |
| Tocchetto, 2014 [36]     | Uncertain | Low | High |
| Tripathy, 2022 [117]     | High      | Low | High |
| Vidhya, 2022 [99]        | High      | Low | High |
| Yang, 2020 [90]          | High      | Low | High |
| Yi Ma, 2019 [91]         | High      | Low | High |
| Zulfiqar, 2021 [18]      | Uncertain | Low | High |

## Search strategy:

Cochrane Central Register of Controlled Trials (CCTR) via Ovid (1991+):

((((auscultat\* or stethoscope\* or ((lung\* or breath\* or respirat\* or pulmonary) adj2 sound\*))).ab,hw,ti. AND (remote\* or tele\* or biotele\* or ehealth or e-health or mhealth or m-health or computeri\* or digit\* or electr\* or wireless\* or visual\* or automat\* or smartphone\* or smart-phone\* or mobile-app\* or virtual\*).ab,hw,ti. AND ((remote\* or tele\* or biotele\* or ehealth or e-health or mhealth or m-health or computeri\* or digit\* or electr\* or wireless\* or visual\* or automat\* or smartphone\* or phone\* or mobile-app\* or virtual\*).ti,kw. or ((auscultat\* or stethoscope\* or ((lung\* or breath\* or respirat\* or pulmonary) adj2 sound\*)) adj4 (remote\* or tele\* or biotele\* or ehealth or e-health or computeri\* or digit\* or electr\* or wireless\* or visual\* or automat\* or smartphone\* or phone\* or mobile-app\* or virtual\*).ab,kw,ti.) or (teleauscultat\* or digiscope\*).ab,hw,ti.) AND (airway or asthma\* or bronch\* or cardiopulmonary or chest or COPD or diaphragm or lung\* or mediastinal or pleur\* or pneumo\* or pulmonary or thora\* or trach\*).ab,hw,ti.) NOT ((canine\* or dog or dogs or feline\* or hamster\* or lamb or lambs or sheep or mice or mouse or murine or monkey\* or pig\* or porcine or primate\* or rabbit\* or rat or rats or rodent\* or horse\* or equine\* or veterinar\*).ti,hw. OR (fetal or fetus or newborn\* or neonat\* or infant\* or toddler\* or child\* or adolesc\* or teen\* or youth or school\* or pediatric\* or paediatric\*).ti.)

Embase via Ovid (1974+):

((exp auscultation/ or exp abnormal respiratory sound/ or (auscultat\* or stethoscope\* or ((lung\* or breath\* or respirat\* or pulmonary) adj2 sound\*))).ab,kw,ti.) AND (exp telecommunication/ or videoconferencing/ or wireless communication/ or exp telemetry/ or exp amplifier/ or smartphone/ or exp mobile application/ or (remote\* or tele\* or biotele\* or ehealth or e-health or mhealth or m-health or computeri\* or digit\* or electr\* or wireless\* or visual\* or automat\* or smartphone\* or smart-phone\* or mobile-app\* or virtual\*).ab,kw,ti.) AND (exp \*telecommunication/ or \*videoconferencing/ or \*wireless communication/ or exp \*telemetry/ or \*smartphone/ or exp \*mobile application/ or exp \*amplifier/ or exp \*auscultation/ or (remote\* or tele\* or biotele\* or ehealth or e-health or mhealth or m-health or computeri\* or digit\* or electr\* or wireless\* or visual\* or automat\* or smartphone\* or phone\* or mobile-app\* or virtual\*).ti,kw. or ((auscultat\* or stethoscope\* or ((lung\* or breath\* or respirat\* or pulmonary) adj2 sound\*)) adj4 (remote\* or tele\* or biotele\* or ehealth or e-health or computeri\* or digit\* or electr\* or wireless\* or visual\* or automat\* or smartphone\* or phone\* or mobile-app\* or virtual\*).ab,kw,ti,tw. or (teleauscultat\* or digiscope\*).ab,kw,ti.) AND (exp respiratory

tract disease/ or exp respiratory tract disease assessment/ or (airway or asthma\* or bronch\* or cardiopulmonary or chest or COPD  
or diaphragm or lung\* or mediastinal or pleur\* or pneumo\* or pulmonary or thora\* or trach\*).ab,kw,ti,tw.)) NOT ((exp animal/ or  
exp juvenile animal/ or adult animal/ or animal cell/ or animal tissue/ or nonhuman/ or animal experiment/ or animal model/) not  
exp human/ or (canine\* or dog or dogs or feline\* or hamster\* or lamb or lambs or sheep or mice or mouse or murine or monkey\* or  
pig\* or porcine or primate\* or rabbit\* or rat or rats or rodent\* or horse\* or equine\* or veterinar\*).ti,kw,dq,jx. OR (exp juvenile/ not  
adult/)) Limit to English, 1990+

MEDLINE via Ovid (1946+ and Epub Ahead of Print, In-Process & Other Non-Indexed Citations and Ovid MEDLINE(R) Daily):

((exp Auscultation/ or Respiratory Sounds/ or (auscultat\* or stethoscope\* or ((lung\* or breath\* or respirat\* or pulmonary) adj2  
sound\*)).ab,kf,ti.) AND (exp Telecommunications/ or Amplifiers, Electronic/ or Smartphone/ or Mobile Applications/ or (remote\*  
or tele\* or biotele\* or ehealth or e-health or computeri\* or digit\* or electr\* or wireless\* or visual\* or automat\* or smartphone\* or  
smart-phone\* or mobile-app\* or virtual\*).ab,kw,ti.) AND (exp \*Telecommunications/ or \*Amplifiers, Electronic/ or \*Smartphone/ or  
\*Mobile Applications/ or (remote\* or tele\* or biotele\* or ehealth or e-health or mhealth or m-health or computeri\* or digit\* or electr\*  
or wireless\* or visual\* or automat\* or smartphone\* or phone\* or mobile-app\* or virtual\*).ti,kw. or ((auscultat\* or stethoscope\* or  
((lung\* or breath\* or respirat\* or pulmonary) adj2 sound\*)) adj4 (remote\* or tele\* or biotele\* or ehealth or e-health or mhealth or m-  
health or computeri\* or digit\* or electr\* or wireless\* or visual\* or automat\* or smartphone\* or phone\* or mobile-app\* or vir-  
tual\*).ab,kf,ti,tw. or (teleauscultat\* or digiscope\*).ab,kw,ti.) AND (exp Respiratory Tract Diseases/ or (airway or asthma\* or  
bronch\* or cardiopulmonary or chest or COPD or diaphragm or lung\* or mediastinal or pleur\* or pneumo\* or pulmonary or thora\*  
or trach\*).ab,kw,ti,tw.)) NOT ((exp Animals/ or Models, Animal/ or Disease Models, Animal/) not Humans/ or (canine\* or dog or  
dogs or feline\* or hamster\* or lamb or lambs or sheep or mice or mouse or murine or monkey\* or pig\* or porcine or primate\* or  
rabbit\* or rat or rats or rodent\* or horse\* or equine\* or veterinar\*).ti,kw,jw. OR (exp Infant/ or exp CHILD/) not exp ADULT/))  
Limit to English, 1990+

Scopus via Elsevier (1970+):

(( ( TITLE-ABS-KEY ( auscultat\* OR stethoscope\* ) OR TITLE-ABS-KEY ( ( lung\* OR breath\* OR respirat\* OR pulmonary ) W/2  
sound\* ) ) ) AND ( TITLE-ABS-KEY ( remote\* OR tele\* OR biotele\* OR ehealth OR e-health OR mhealth OR m-health OR comput-  
eri\* OR digit\* OR electr\* OR wireless\* OR visual\* OR automat\* OR smartphone\* OR smart-phone\* OR mobile-app\* OR virtual\* ) ) )  
AND ( ( TITLE ( remote\* OR tele\* OR biotele\* OR ehealth OR e-health OR mhealth OR m-health OR computeri\* OR digit\* OR  
electr\* OR wireless\* OR visual\* OR automat\* OR smartphone\* OR phone\* OR mobile-app\* OR virtual\* ) OR KEY ( remote\* OR tele\*  
OR biotele\* OR ehealth OR e-health OR mhealth OR m-health OR computeri\* OR digit\* OR electr\* OR wireless\* OR visual\* OR  
automat\* OR smartphone\* OR phone\* OR mobile-app\* OR virtual\* ) OR TITLE-ABS-KEY ( teleauscultat\* OR digiscope\* ) OR TI-  
TLE-ABS-KEY ( ( auscultat\* OR stethoscope\* OR ( ( lung\* OR breath\* OR respirat\* OR pulmonary ) W/2 sound\* ) ) W/4 ( remote\*  
OR tele\* OR biotele\* OR ehealth OR e-health OR computeri\* OR digit\* OR electr\* OR wireless\* OR visual\* OR automat\* OR  
smartphone\* OR phone\* OR mobile-app\* OR virtual\* ) ) ) ) AND ( TITLE-ABS-KEY ( airway OR asthma\* OR bronch\* OR cardio-  
pulmonary OR chest OR copd OR diaphragm OR lung\* OR mediastinal OR pleur\* OR pneumo\* OR pulmonary OR thora\* OR  
trach\* ) ) ) AND NOT ( TITLE ( canine\* OR dog OR dogs OR feline\* OR hamster\* OR lamb OR lambs OR sheep OR mice OR mouse  
OR murine OR monkey\* OR pig\* OR porcine OR primate\* OR rabbit\* OR rat OR rats OR rodent\* OR horse\* OR equine\* OR veteri-  
nar\* OR fetal OR fetus OR newborn\* OR neonat\* OR infant\* OR toddler\* OR child\* OR adolesc\* OR teen\* OR youth OR school\* OR  
pediatric\* OR paediatric\* ) OR SUBJAREA ( vete ) ) AND ( LIMIT-TO ( SRCTYPE,"j" ) ) AND ( LIMIT-TO ( DOCTYPE,"ar" ) OR

LIMIT-TO ( DOCTYPE,"cp" ) OR LIMIT-TO ( DOCTYPE,"re" ) OR LIMIT-TO ( DOCTYPE,"le" ) OR LIMIT-TO ( DOCTYPE,"no" ) 97  
 OR LIMIT-TO ( DOCTYPE,"sh" ) OR LIMIT-TO ( DOCTYPE,"ed" ) OR LIMIT-TO ( DOCTYPE,"dp" ) ) AND ( LIMIT-TO ( 98  
 PUBYEAR,2021) OR LIMIT-TO ( PUBYEAR,2020) OR LIMIT-TO ( PUBYEAR,2019) OR LIMIT-TO ( PUBYEAR,2018) OR LIMIT-TO 99  
 ( PUBYEAR,2017) OR LIMIT-TO ( PUBYEAR,2016) OR LIMIT-TO ( PUBYEAR,2015) OR LIMIT-TO ( PUBYEAR,2014) OR LIMIT- 100  
 TO ( PUBYEAR,2013) OR LIMIT-TO ( PUBYEAR,2012) OR LIMIT-TO ( PUBYEAR,2011) OR LIMIT-TO ( PUBYEAR,2010) OR 101  
 LIMIT-TO ( PUBYEAR,2009) OR LIMIT-TO ( PUBYEAR,2008) OR LIMIT-TO ( PUBYEAR,2007) OR LIMIT-TO ( PUBYEAR,2006) 102  
 OR LIMIT-TO ( PUBYEAR,2005) OR LIMIT-TO ( PUBYEAR,2004) OR LIMIT-TO ( PUBYEAR,2003) OR LIMIT-TO ( 103  
 PUBYEAR,2002) OR LIMIT-TO ( PUBYEAR,2001) OR LIMIT-TO ( PUBYEAR,2000) OR LIMIT-TO ( PUBYEAR,1999) OR LIMIT-TO 104  
 ( PUBYEAR,1998) OR LIMIT-TO ( PUBYEAR,1997) OR LIMIT-TO ( PUBYEAR,1996) OR LIMIT-TO ( PUBYEAR,1995) OR LIMIT- 105  
 TO ( PUBYEAR,1994) OR LIMIT-TO ( PUBYEAR,1993) OR LIMIT-TO ( PUBYEAR,1992) OR LIMIT-TO ( PUBYEAR,1991) OR 106  
 LIMIT-TO ( PUBYEAR,1990) ) AND ( LIMIT-TO ( LANGUAGE,"English" ) ) AND ( LIMIT-TO ( EXACTKEYWORD,"Lung Auscul- 107  
 tation" ) OR LIMIT-TO ( EXACTKEYWORD,"Auscultation" ) ) 108

Web of Science Core Collection via Clarivate Analytics (1975+): 109

((TS=(auscultat\* or stethoscope\* or ((lung\* or breath\* or respirat\* or pulmonary) NEAR/2 sound\*)) AND TS=(remote\* or tele\* or 110  
 biotele\* or ehealth or e-health or mhealth or m-health or computeri\* or digit\* or electr\* or wireless\* or visual\* or automat\* or 111  
 smartphone\* or smart-phone\* or mobile-app\* or virtual\*) AND (TITLE=(remote\* or tele\* or biotele\* or ehealth or e-health or 112  
 mhealth or m-health or computeri\* or digit\* or electr\* or wireless\* or visual\* or automat\* or smartphone\* or phone\* or mobile-app\* 113  
 or virtual\*) OR TS=((auscultat\* or stethoscope\* or lung-sound\* or breath-sound\* or respiratory-sound\* or respiration-sound\* or 114  
 pulmonary-sound\*) NEAR/4 (remote\* or tele\* or biotele\* or ehealth or e-health or computeri\* or digit\* or electr\* or wireless\* or 115  
 visual\* or automat\* or smartphone\* or phone\* or mobile-app\* or virtual\*)) OR TS=breathing-sound\* ) OR TS=(teleauscultat\* or digi- 116  
 scope\*) AND (TS=(airway or asthma\* or bronch\* or cardiopulmonary or chest or COPD or diaphragm or lung\* or mediastinal or 117  
 pleur\* or pneumo\* or pulmonary or thora\* or trach\*)) NOT (TI=(canine\* or dog or dogs or feline\* or hamster\* or lamb or lambs or 118  
 sheep or mice or mouse or murine or monkey\* or pig\* or porcine or primate\* or rabbit\* or rat or rats or rodent\* or horse\* or equine\* 119  
 or veterinar\* or fetal or fetus or newborn\* or neonat\* or infant\* or toddler\* or child\* or adolesc\* or teen\* or youth or school\* or pedi- 120  
 atric\* or paediatric\*) OR SU=veterin) Limit to English, 1990+, exclude meeting abstracts, book chapters 121

122

123

124
